# Supplementary material for: CYP7B1 as a Biomarker for Prostate Cancer Risk and Progression: Metabolic and Oncogenic Signatures (Diagnostic Immunohistochemistry Analysis by Tissue Microarray in Prostate Cancer Patients—Diamond Study)
Source: MDPI journal article supplement (doi:10.3390/ijms25094762), 2024-04-27
Supplement: s1 [file s1]

**Suppl. Table S1.** CYP7B1 expression according to IHC score in non-diabetic patients.

|                                           | CYP7B1              |                     | p-value |
|-------------------------------------------|---------------------|---------------------|---------|
|                                           | N = 192             | N = 106             |         |
| Age (years), median (Q1-Q3)               | 70.0 (64.0-75.0)    | 67.0 (63.0-71.0)    | <0.01   |
| PSA (ng/ml), median (Q1-Q3)               | 6.15 (3.70-9.20)    | 7.40 (5.70-11.40)   | <0.01   |
| Fasting glucose (mg/dl), median (Q1-Q3)   | 94.0 (85.0-101.0)   | 93.50 (86.0-101.0)  | 0.92    |
| Total cholesterol (mg/dl), median (Q1-Q3) | 191.0 (163.0-216.0) | 192.0 (171.0-224.0) | 0.37    |
| Triglycerides (mg/dl), median (Q1-Q3)     | 107.0 (69.0-141.0)  | 103.0 (68.5-146.5)  | 0.84    |
| Group, n (%)                              |                     |                     | <0.01   |
| BPH                                       | 66 (34.48)          | 4 (3.77)            |         |
| PC                                        | 126 (65.62)         | 102 (96.23)         |         |
| ISUP Gleason score, n (%)                 |                     |                     | 0.32    |
| 1                                         | 42 (33.33)          | 26 (25.49)          |         |
| 2                                         | 49 (38.89)          | 41 (40.20)          |         |
| 3                                         | 26 (20.63)          | 22 (21.57)          |         |
| 4                                         | 3 (2.38)            | 8 (7.84)            |         |
| 5                                         | 6 (4.76)            | 5 (4.90)            |         |
| Pathological stage, n (%)                 |                     |                     | 0.02    |
| T2                                        | 93 (73.81)          | 69 (67.65)          |         |
| T3                                        | 26 (20.63)          | 16 (15.69)          |         |
| T4                                        | 7 (5.56)            | 17 (16.67)          |         |
| Classification risk of PC, n (%)          |                     |                     | 0.42    |
| Low risk                                  | 49 (38.89)          | 33 (32.35)          |         |
| Intermediate risk                         | 53 (42.06)          | 43 (42.16)          |         |
| High risk                                 | 24 (19.05)          | 26 (25.49)          |         |
| Ki-67 positive score, n (%)               | 24 (12.50)          | 17 (16.04)          | 0.39    |
| AR positive score, n (%)                  | 86 (44.79)          | 55 (51.89)          | 0.24    |
| PSMA positive score, n (%)                | 61 (31.77)          | 56 (52.83)          | <0.01   |
| IR- $\alpha$ positive score, n (%)        | 107 (55.73)         | 101 (95.28)         | <0.01   |
| IR- $\beta$ positive score, n (%)         | 4 (2.08)            | 16 (15.09)          | <0.01   |
| IGF-1R positive score, n (%)              | 28 (14.58)          | 22 (20.75)          | 0.17    |
| ATPLy positive score, n (%)               | 72 (37.50)          | 71 (66.98)          | <0.01   |
| SRSF-1 positive score, n (%)              | 82 (41.71)          | 70 (66.04)          | <0.01   |
| CPT1-a positive score, n (%)              | 27 (14.06)          | 23 (21.70)          | 0.09    |
| SCD-1 positive score, n (%)               | 28 (14.58)          | 20 (18.87)          | 0.33    |
| SREBP1 positive score, n (%)              | 54 (28.12)          | 18 (16.98)          | 0.03    |
| FAS positive score, n (%)                 | 91 (47.40)          | 80 (75.47)          | <0.01   |
| ACC-1 positive score, n (%)               | 52 (27.08)          | 53 (50.0)           | <0.01   |

IHC = Immunohistochemistry; BPH = Benign Prostatic Hyperplasia; PC = prostate cancer; Q1-Q3 = interquartile range; CYP7B1 = Cytochrome 7B1; AR = Androgenic receptor; PSA = Prostate-Specific antigen; IR=insulin receptor; IGF-1R = insulin-like growth factor-1 receptor; PSMA = prostate specific membrane antigen; SRSF-1 = Serine/arginine-rich splicing factor 1; FAS = fatty acid synthase; CPT-1a = Carnitine palmitoyltransferase 1a; SCD-1 = Stearoyl-CoA desaturase-1; SREBP-1 = Sterol regulatory element-binding protein-1; AC-1 = Acetyl-CoA Carboxylase-1.
